# Supplementary material
Source: PubMed Central journal article supplement (PMC5070921)

# Supplemental Figure 1

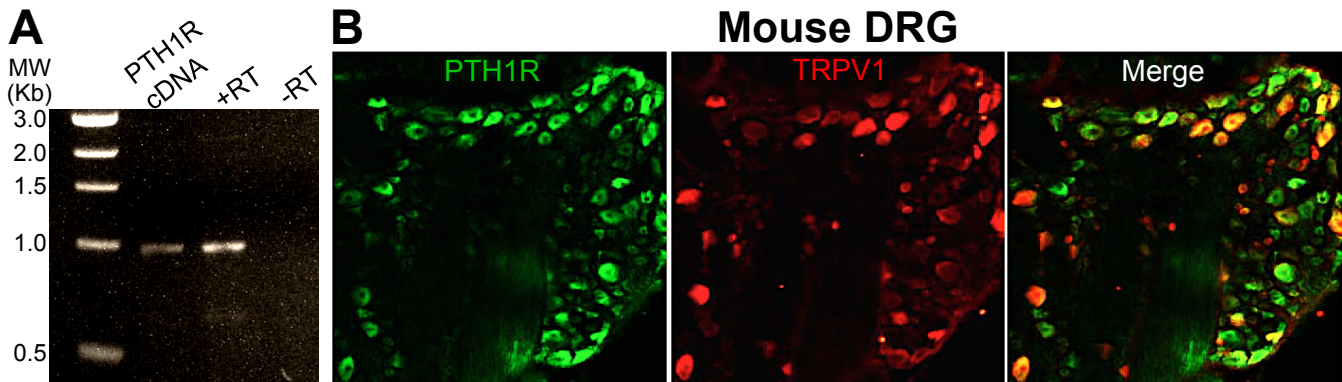

**C**

mPTH1R-YFP Transfected HEK293 Cells

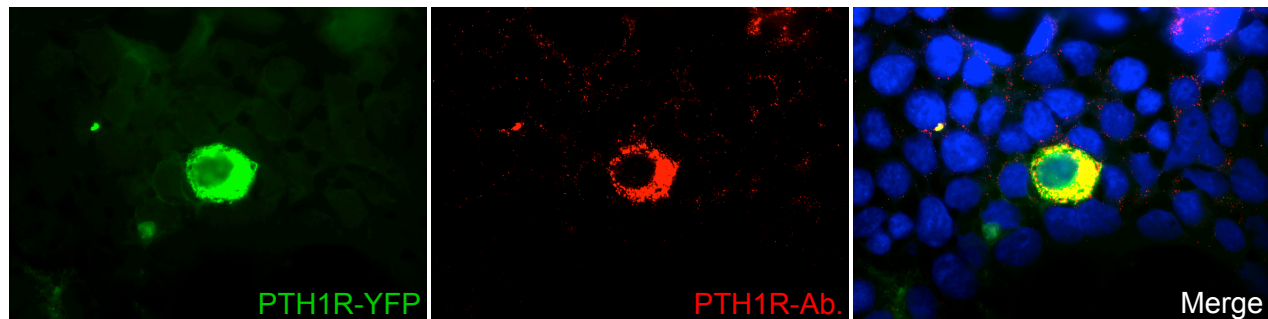

Supplement: NIHMS822499-supplement-Supplemental_Figure_1.pdf [file NIHMS822499-supplement-Supplemental_Figure_1.pdf]
